# Supplementary material for: Strong Increase of Thawing of Subsea Permafrost in the 22nd Century Caused by Anthropogenic Climate Change
Source: Copernicus journal article supplement (doi:10.5194/tc-2021-231), 2021-09-03
Supplement: Supplementary file [file tc-2021-231-AC2-supplement.pdf]

Over all, the manuscript by Wilkenskjeld et al. is an interesting one describing a first attempt to include benthic sediment temperatures within the framework of an Earth system model across the entire Arctic benthic environment.

We appreciate that the reviewer finds our work interesting and acknowledge the suggestions for improvement. Some of the reviewer's questions are aiming at the workings of the MPI-OM, the oceanic component of MPI-ESM from which we get our most important upper boundary conditions. We need to highlight, that none of the authors have direct experience with this ocean model. Also the experiments from which our data stem (Kleinen et al., 2021) were not conducted with an oceanic focus. We have regrouped some of the questions and comments to improve the text flow.

My main comments are

(1) to try to focus a bit more on the clearly reporting of the results, to show what the model is projecting for each of the scenarios

We will in the revised manuscript further highlight the development and differences of the different scenarios.

(2) to discuss what the initial trend in the benthic temperatures are, and how confident we are in those given the model initialization protocol.

This issue is a major concern for the other reviewer (A. Eliseev). We thus made an elaborate answer to him which we copy here:

The SuPerMAP points were initialized at 50 ka BP with steady state vertical profiles calculated using the geothermal heat flux at 2 km depth and averaged surface temperatures from 400 ka long runs from a limited number points as boundary conditions (see Overduin et al. (2019) for more details). By using these long term averages – longer than the time scale proposed by Malakhova and Eliseev (2017) to be necessary for the deep sediments to become into equilibrium - this approach rules out transient effects in the deeper parts of the sediments. In the period 50 ka BP to the LGM 23.5 ka BP the SuPerMAP model was run using the boundary conditions as described in Overduin et al (2019). To diminish initial shocks and transient effects from changing the model from SuPerMAP to JSBACH in year 1850, several different ways of doing the transition from the idealized upper boundary conditions described in Overduin et al. (2019) to the “realistic” forcing from MPI-ESM (assuming that the benthic temperatures from the preindustrial period (1850-1873) of the CMIP6 runs are representative for the entire holocene), were tested (Fig. RA1). The approach resulting in the least “noise” turned out to be an interpolation from 23.5 ka BP to 1 ka BP, keeping the forcing constant over the last 1000 years of the SuPerMAP runs. How this interpolative approach exactly compares to the  $O(10^4)$  year time scale proposed by Malakhova and Eliseev (2020) for adjusting the sediments to the forcing is not completely clear, but it is at least at the same order of magnitude.

In the manuscript, it may it may not have been made sufficiently clear, that our runs reuse the SuPerMAP runs before the LGM, only modifying the last part of the forcing compared to the experiment presented in Overduin et al. (2019). This may have given rise to the impression that our total spin-up length is only 23.5ka, which would, indeed, limit the usage of our study. We will clarify this in the revised version of the manuscript.

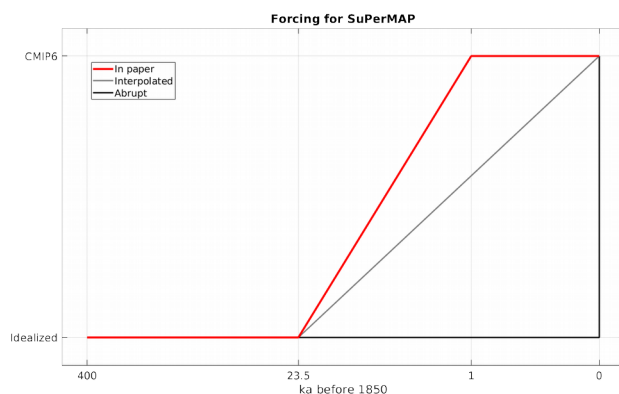

*Fig. RA1: Tested forcing pathways for the SuPerMAP spin-up runs.*

The two models used (SuPerMAP and JSBACH) have very different purposes. Whereas JSBACH is the land component of the MPI-ESM and thus a state-of-the-art terrestrial land and vegetation model with a (normally shallow) soil model designed for typical climate projection time scales of approximately 100-1000 years with high temporal resolution, SuPerMAP is a specialized permafrost, deep soil, model with the capability of repeated ocean transgression/regression cycles, designed for very long time scales. The focus of SuPerMAP is to determine the melting of sub-sea permafrost by geo-thermal heat flux (i.e. from below) and our present work is mainly on the additional melting from above caused by anthropogenic climate change. To be able to extent a very long spin-up to get sensible soil temperature and ice content with climate projections at high temporal resolution (both of forcings and results), this two-model approach has been necessary despite the issues about differences in model physics and interpolation of initial conditions, eventually leading to transient effects.

The two approaches sketched in gray/black colors in Fig. RA1 indeed lead to severe transient effects within the JSBACH runs. It has not been possible to completely eliminate these effects, which are visible as a slightly higher initial melting rate in Figs. 2 and S7 in the manuscript. In Fig. RA2 we used the pmt\_pre experiment (which was run with cyclic forcing) to quantify these effects by showing the average melting rate for each of the 24 year forcing cycles. In this experiment a small decrease in Sub-Sea Permafrost (SSPF) ice melting should be expected over time, since individual points may lose all SSPF ice. Despite this small effect, we take the SSPF ice melting from the average from cycle 8 (starting in 2018) to the end of the experiment as the best guess value for the “true” steady state melting rate corresponding to the preindustrial (or holocene) forcing. This average is about  $7.4 \text{ km}^3/\text{a}$ . Indeed specially the first cycle (1850-1873) has a melting rate almost twice as high as this average, but already in the second the difference is much diminished (25% additional melting). The average additional melting during the first 7 cycles is about  $\sim 1.8 \text{ km}^3/\text{a}$ , only  $\sim 25\%$  of the best guess. For comparison the peak melting in pmt\_ssp585 is  $>100 \text{ km}^3/\text{a}$ . Calculating the average melting rates from the pmt\_sspXXX experiments for the same 24 year intervals reveals that these exceeds those of pmt\_pre already for the third “cycle”, i.e. from the year 1898 (not shown), indicating that the climatic signal from here on exceeds the initial “noise”. Since our focus is on the inter-SSP differences (after 2010), these transient effects have been considered unimportant, but of course deserve to be mentioned in the discussion in the revised manuscript.

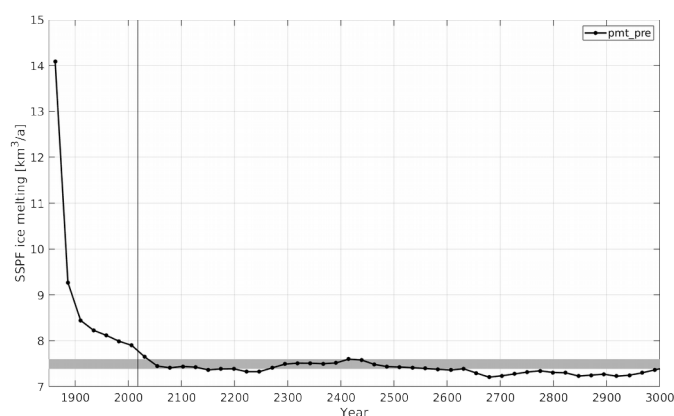

*Fig. RA2: SSPF ice melting in the pmt\_pre experiments averaged over each 24 year forcing cycle. Each point mark the average of one forcing cycle. Gray hatch is the mean  $\pm$  two standard deviations of the melting from 2018 (forcing cycle 8) to the end of the experiment (to the right of the vertical line).*

While some sensitivity tests were carried out for some of the modelling assumptions made, I am curious whether there are other parameters in the model that could give very different results.

For example, how was the thermal conductivity and porosity of these sediments calculated, and how well constrained are those estimates?

The sediment porosity was adapted from the the SuPerMAP model to keep these two models as consistent as possible. The porosity of SuPerMAP was fitted to the bulk density data of Gu et al. (2014). Also Goto et al. (2017) finds porosity to decrease exponentially with depth.

The thermal properties of our sediment model are those standard values for the JSBACH soil model used for numerous studies including the CMIP6 model comparison project. These are composed of “bedrock” (which in this study is to be interpreted as “sediment”) and water fractions weighted by the porosity. The values used were: 2 W/Km (“bedrock”) and 0.57 W/Km (water) for thermal conductivity and  $2 \times 10^6$  J/(Km<sup>3</sup>) (“bedrock”) and  $4.218 \times 10^6$  J/(Km<sup>3</sup>) (water) for heat capacity. We have regarded this part of the model as set and it being a study of itself to adapt it. We thus regarded tuning of these parameters to be beyond the scope of the present study.

Since the question on the sensitivity of our results to these parameters is very relevant, we now conducted additional scenarios (see below), where we replaced the JSBACH “bedrock” values with the those presented in Goto et al. (2017). They report values about 0.8 W/Km and  $3.6 \times 10^6$  J/(Km<sup>3</sup>) for the two parameters respectively from several locations with muddy sediments (porosity >70%) of the coast of Japan. Since JSBACH further adds it's own pore water, we end up with effective values close to those of pure water, which (when no advective processes are accounted for) must be regarded as the most extreme possible setting for delaying heat propagation through the sediments.

### Are the timing of results robust with respect to this uncertainty?

Based on the discussion above, we created the new low conductivity scenarios pmt\_ssp585\_lc and pmt\_pre\_lc using the values of Goto et al. (2017) and otherwise being identical to pmt\_ssp585 and pmt\_pre respectively.

Results shows that the time that melting of SSPF ice (Fig. GB3) accelerates is largely unaffected by the change of thermodynamic properties of the sediments. The ratio of the melting to the respective preindustrial scenario (Fig. GB4) is even increasing from about 15 to about 26 in the 22<sup>nd</sup> century for the low conductivity case, indicating the influence of anthropogenic climate change to be even more dramatic than stated in the manuscript.

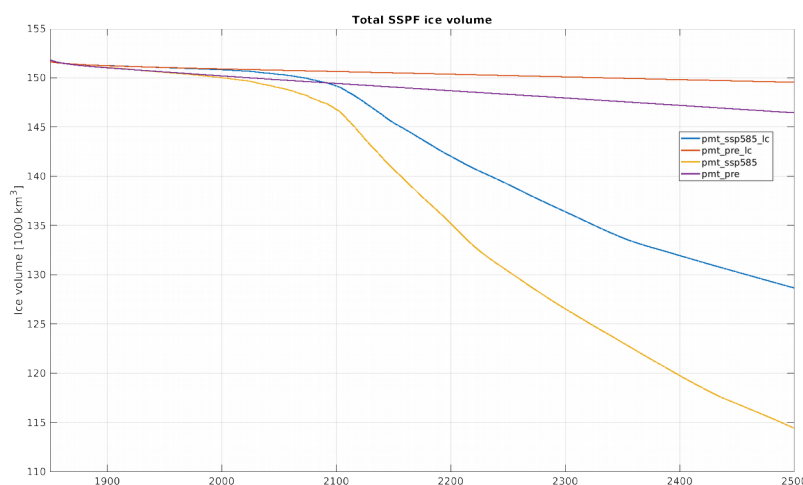

*Fig. GB3. Total SSPF ice volume for the standard and “low conductivity” versions of pmt\_ssp585 and pmt\_pre.*

On the other hand, the absolute melting, is reduced by almost a factor of about 1.8 on average over 1850-2549 in the low conductivity experiments. The absolute melting rate is controlling the change of the IBPT and thus the potential carbon release to the climate system which would thus be accordingly lower. The ratio is higher than average until year 2100 (about 2.5 throughout the 20<sup>th</sup> century) and generally lower after 2100.

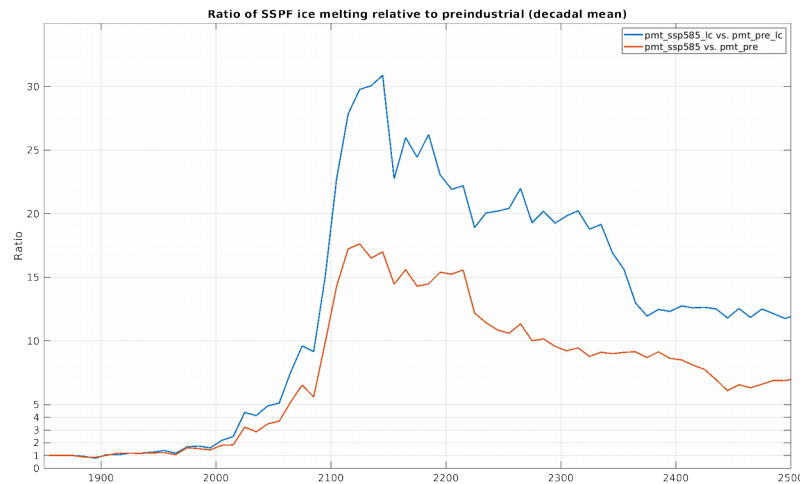

*Fig. GB4. Melting ratios of SSPF ice in pmt\_ssp585 and pmt\_ssp585ic relative to pmt\_pre and pmt\_pre\_ic respectively.*

Are the heat flux assumptions made in the benthic model consistent with those used in the land model?

The benthic model is an extension of the land model below the ocean, thus using the same heat flux parameterization. We though assume that there is no radiative energy transfer between ocean and sediments.

Also, given the importance of freeze/thaw processes in the manuscript, I'd like to see a bit more description of how the temperature diffusion and latent heat effects were calculated in the model.

Since we did not do any changes to this part of the model, we are hesitating to blow up the size of the paper by copying unchanged material from some of our references. Specifically, details can be found in Ekici et al. (2014) and de Vrese et al. (2020).

Why didn't the authors just set an observed salt gradient rather than disallowing the porewaters to freeze?

This is a nice idea which could have been implemented. It would, however, not take into account the temporal variability (especially: trend) that there might be in the benthic salinity. This could become important when going into the future. For future studies, we will implement a complete salt diffusion scheme which will eliminate the need for the "no freeze" assumption.

Also, what about pressure effects on freezing point depression, it seems like those are relevant to this system?

In the preparations of the SuPerMAP runs, which served as initial conditions for the present study, hydrostatic pressure effects on freezing point depression were considered. Preliminary calculations revealed that the effect of pressure on the freezing point depression is small relative to that of dissolved salts, especially over the depth ranges of interest for permafrost (few hundreds of meters). It was therefore not included in the SuPerMAP calculations (Overduin et al. (2019)). Including it in the present study would therefore enhance the differences between the two models and thus lead to an increased initial shock in our model.

Including hydrostatic pressure effects would e.g. at 500 m depth lower the freezing point by around 0.35°C and thus tend to lower the amount of ice in the lower portion of modelled permafrost. Since the majority of the effects discussed in the present study are much further up in the sediments (<100 m depth) the effects will be proportionally smaller.

I see that there is some discussion of the effects of this assumption in section 4.2, but I think some clearer discussion of this here would help.

We will extend and clarify the discussion on this point in the revised manuscript.

Also what are the nominal resolutions of the GR30 and T63 grids?

T63 is a spherical grid (equivalent to a lat/lon grid with small variations in the distance between the latitudes – specially very close to the poles) with a resolution of about  $1.9 \times 1.9$  degrees all over the globe. At the latitudes of Arctic SSPF this corresponds to approximately  $50 \times 200$  km as pointed out in line 80 of the manuscript. The GR30 is a lat/lon-grid with rotated poles (placed on Greenland and somewhere on the Antarctic continent) which makes it difficult to assign it with a nominal resolution. In the relevant latitudes (65N through 80N) the average point distance is about 70 km, ranging from about 40 km near Greenland to about 200 km off the Siberian coast (Fig. RB5).

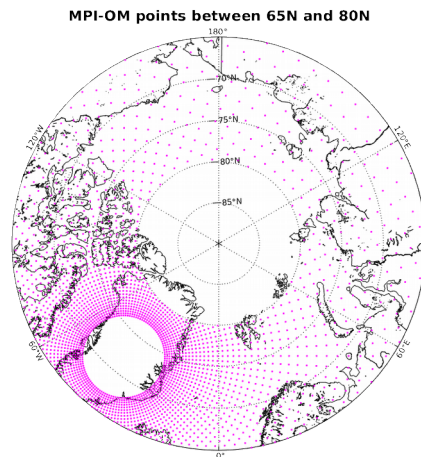

Fig. RB5: Distribution of MPI-OM GR30 points between 65N and 80N.

What is the depth distribution of ocean model layers?

The MPI-OM setup uses 40 layers a fixed depths. The layer midpoints in meters are:

7.5, 20, 30, 40, 50, 60, 71.5, 85.5, 103, 125.5, 153, 185.5, 223, 265.5, 313, 365.5, 423, 488, 563, 648, 743, 848, 963, 1088, 1223, 1368, 1528, 1703, 1888, 2083, 2293, 2528, 2788, 3073, 3398, 3773, 4198, 4673, 5173, 5723.

p. 2, section 2.1: Some more info is needed on how MPI-OM calculates the benthic temperature.

The benthic temperature is taken as the temperature of the lowest oceanic model layer above the ocean bottom. For further information here we could only copy from published literature on MPI-OM (e.g. Mauritzen et al. (2019), Jungclauss et al. (2006, 2013)).

How well does the model represent the observed benthic climate?

Referring to the observations presented in Dmitrenko et al. (2011) in the Laptev Sea, reporting an increase of benthic summer temperatures of 2.1 K between 1985 and 2009, we looked into similar area and period in our data (Fig. RB6 and RB7).

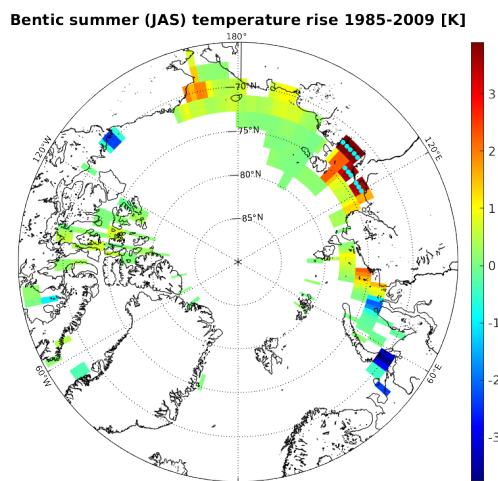

Fig. RB6: Change in benthic summer temperature from 1985 to 2009 (all scenarios except pmt\_pre). Cyan dots mark the 11 points (Laptev and eastern Kara Seas) included in the time series in Fig. 2. These 11 points also happens to be those with the highest temperature change.



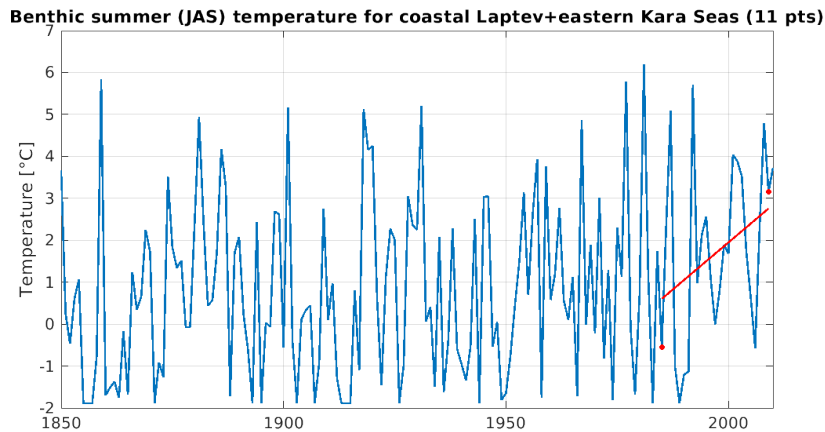

*Fig RB7: Time series of benthic summer (JAS) temperatures for points marked in Fig. RB6 (all scenarios except pmt\_pre). The difference between 2009 and 1985 (red dots) is ~3.5K and the linear trend (red line) indicate a warming of 2.15K in this period. This is in very close agreement with the results of Dmitrenko et al. (2011).*

Based on this analysis we conclude that:

- 1) The GR30 version of MPI-OM seems to be doing a remarkable good job in reproducing the benthic temperature changes on the shelves of the Laptev and Kara seas, despite its coarse resolution in this area (see above).
- 2) The warming reported in Dmitrenko et al. (2011) seems to be a regional phenomenon and – looking at the time series – to be limited to these few decades. As well the minimum and maximum of the period between 1985 and 2009 are within the range of the temperature variations between 1850 and 1984.

Based on this case study, which seems to be a rather extreme case, we expect the modelled benthic temperatures to be roughly in agreement with observations. Also it seems plausible that the development of ocean temperatures (including the benthic) on the shelves roughly follows that of the atmospheric temperatures – eventually with some delay. This effect is for the future part of our study the most important.

Also what aspects of the CLIMBER output were used to force MPI-ESM, just CO<sub>2</sub> and other GHGs?

Only CO<sub>2</sub> was adopted from the CLIMBER simulations as boundary conditions for the MPI-ESM runs creating our benthic temperatures. CH<sub>4</sub> were calculated interactively in MPI-ESM and N<sub>2</sub>O was kept constant. See Kleinen et al. (2021) for details.

p. 3 l. 70-79. These two paragraphs seem in conflict with each other. Either salt diffusion is slow and unimportant, or it is fast and important.

Our assumption with respect to salt diffusion is that it is too slow to be important at the time scale we cover in the present study (O(1000yr)), though it is definitely play an important role for longer (i.e. glacial) time scales. We will clarify this in the revised manuscript.

p. 5, l. 136 Is this thawing under preindustrial forcing to be interpreted as lagged thaw following LGM, or is it an artifact of the imposed initial conditions?

The SSPF has since it's inundation generally been overlaid by comparatively warm oceanic water, causing a steady thawing from above which – at some point in time – will cause all SSPF to be melted away (provided that the world does not enter a new glacial period causing an oceanic regression from the SSPF areas on the oceanic shelves). Therefore the thaw seen applying preindustrial forcing is a lagging effect of the changed climatic conditions since the LGM. Only exception is – as discussed above – a minor additional thaw in the period ~1850-1900 which is either caused by inconsistencies between the physics of SuPerMAP and JSBACH or by physical inconsistencies in the initial conditions of JSBACH arising from the interpolation between the vertical grids of the two models.

Since the general fate of SSPF (independently of climate change) is the basic setting of our study, we will extend the discussion and explanation in the introduction.

figs. 1, 5, & 6: Is 'depth' the depth below the benthic surface or the depth below the sea surface?

Since we haven't dealt with the ocean model ourselves, we do not at all consider the ocean as part of our model domain. Therefore we're always having depth as "below the benthic surface/ocean bottom", which is at a fixed depth since we did not include sedimentation in the JSBACH model. We will clarify this in the revised manuscript.

fig. 3: Is the ratio of melt rate to the preindustrial melt rate a meaningful metric, and if so why? It seems like the absolute loss rate is a more fundamental measure than the relative rate. But if the relative rate is more meaningful, then some background and explanation would be helpful.

We regard both the relative ratio (Fig. 3 in the paper and Fig. GB4) and the absolute melting (Fig. 2 in the paper and Fig. GB3) as important. The relative ratio highlights the influence of the climatic changes, since – as described above – there's always a "background" melting caused by the imbalance remaining from post-LGM climate change and inundation. This is even more highlighted by the additional scenarios `pmt_pre_lc` and `pmt_ssp585_lc` (above). Since the absolute melting via the IBPT controls the release rate of carbon (mainly  $\text{CH}_4$ ) to the ocean, one could phrase it as: The absolute melting states how much damage is done by the melting of SSPF and the relative ratio states how much of this damage is due to (anthropogenic) climate change.

fig. 4: It would be helpful to see some time progression here. For example how much ice will have melted by 2100, 2200, 2300, 2500, and 3000 under each of the scenarios?

The patterns of melting do not change much over time. Therefore we considered these interstadials as being uninteresting. However, taking into account the focus of the paper on the earlier part of the time period (say: before year 2400), it might be worth considering putting a picture of e.g. 2300 into the main text. Additional time slices we can put in the supplement.

fig. 7: Are these annual mean values, and if so, should these be thought of as the spatial area with no ice, or the fraction of the year with no ice?

These are monthly mean values, which are averages of the all the instantaneous (i.e. from each MPI-OM time step) fractional sea ice concentrations for the individual months. Thus it is a combination of an instantaneous fraction (i.e. spatial mean) and a temporal mean.

fig. 7: Why the break in slope at 70% sea ice concentration?

This is hard to say in detail, since this figure basically shows only a correlation, not a causality. In MPI-OM, the sea ice concentration is assumed to be uniformly distributed over the the grid cell. This has the effect, that all sea ice has to melt away before energy is available for heating the ocean water. Our best guess is that for sea ice concentrations >70% sea ice is present for such a long time (within the month) that there's no time to heat the water. Also oceanic advection from neighbouring grid cells may play a role. Anyway: It seems obvious that there has to be a point where the insulating role of sea ice start vanishing, but we have no good explanation why it specifically occurs at around 70%.

fig. 7: Would the plot look different if other explanatory variables (e.g. surface ocean temperature or surface air temperature) were used?

Since the benthic temperatures are the direct driver of the energy input into the sediments we expect a much more clear picture using this variable. The SST is – though it is very similar to the benthic temperatures except in late summer – not quite an as direct driver, and surface air temperature is even less so. A spatially limited illustration of the relation to the surface air temperature can be seen in Fig. 6 of the manuscript (lower panel). This clearly shows the decoupling of the warming of the lower atmosphere and the sediments. For a complete picture we have re-plotted Fig. 7 of the manuscript as function of SST (Fig. GB8 left) and surface air temperature (Fig. GB8 right) instead of benthic temperature. These pictures do in our minds not show any clear interesting patterns.

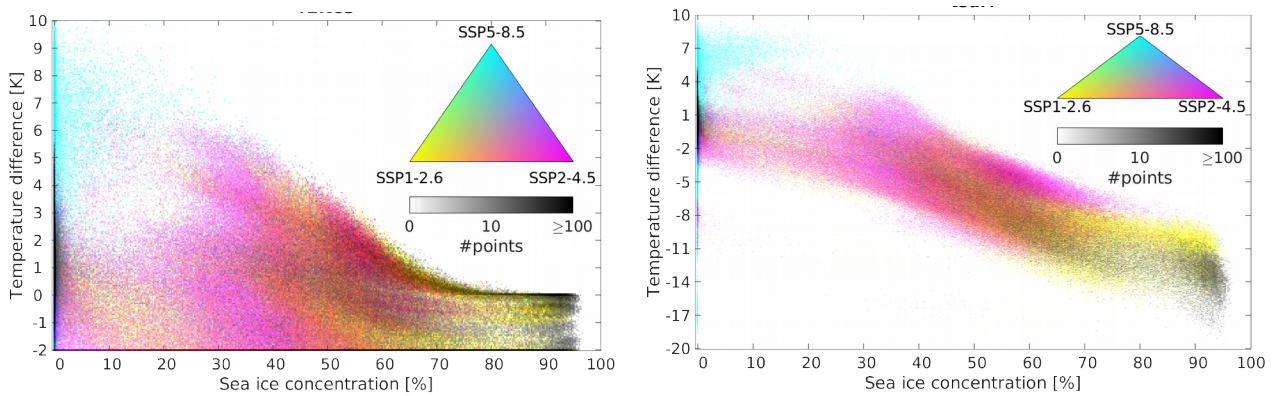

Fig. GB8. As Fig. 7 in the manuscript, but replacing the benthic temperature with SST (left) and surface air temperature (right) respectively.

p. 8, Line 244: does this loss also occur under a steady-state preindustrial climate, or is it a forced response to the historical warming?

The experiment with preindustrial forcing losses about 76% of the SSPF area mentioned in the paper for the historical experiments (Fig. GB9). We attribute this initial loss mainly to loss of thin SSPF ice in the upper layers (which may in parts be an unrealistic artifact of the initialization) for which also the preindustrial forcing is sufficient to melt away. Also the transient effects of the model change discussed above may play a role here. The remaining 24% is due to warming during the historical period. This interesting point will be discussed in the revised manuscript.

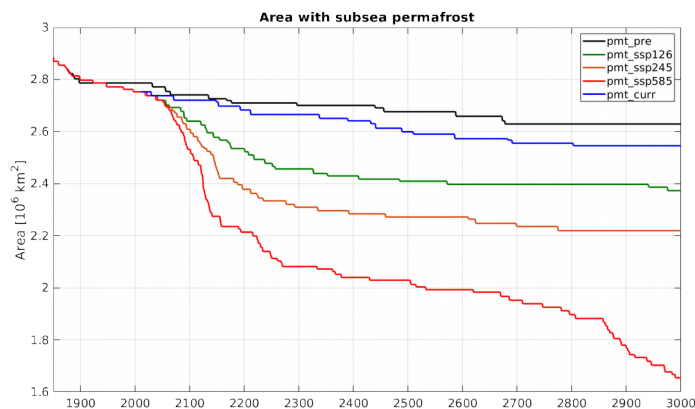

Fig. GB9. Pan-arctic area with SSPF and its development over time for the scenarios presented in the manuscript. The discrete steps are due to the grid cell discretization. Total modelled area is about 4.6 mill. km<sup>2</sup> distributed on 407 points which each either have or does not have SSPF at a certain time.

fig. S1 What are the units?

The unit somehow disappeared from this figure, sorry. It is mK/m (or K/km). Will of course be corrected in the revised manuscript.

fig. S6 Is helpful in interpreting the results, I suggest moving to the main manuscript document.

This figure shows our forcing data only, which we didn't produce ourselves. We judged that we by putting it into the main manuscript risk to confuse what is actually our work and what we included from the work of others. However, since it seems to be more important for the interpretation than anticipated, we will incorporate it in the main part of the revised manuscript.

fig. S11, the right hand side panel isn't interpretable, I think you'd need to show the amplitude for each scenario separately, and using the same color scale for both the historical and future panels.

We will redo this figure for the revised manuscript, separating the three scenarios.



## Bibliography

- de Vrese, P., Stacke, T., Kleinen, T., and Brovkin, V.: Diverging responses of high-latitude CO<sub>2</sub> and CH<sub>4</sub> emissions in idealized climate change scenarios, *The Cryosphere*, 15, 1097–1130, <https://doi.org/10.5194/tc-15-1097-2021>, 2021.
- Ekici, A., Beer, C., Hagemann, S., Boike, J., Langer, M., and Hauck, C.: Simulating high-latitude permafrost regions by the JSBACH terrestrial ecosystem model, *Geoscientific Model Development*, 7, 631–647, <https://doi.org/10.5194/gmd-7-631-2014>, 2014.
- Goto, S., Yamano, M., Morita, S., Kanamatsu, T., Hachikubo, A., Kataoka, S., Tanahashi, M., and Matsumoto, R.: Physical and thermal properties of mud-dominant sediment from the Joetsu Basin in the eastern margin of the Japan Sea, *Marine Geophysical Research*, 38, 393–407, <https://doi.org/10.1007/s11001-017-9302-y>, 2017.
- Gu, X., Tenzer, R., and Gladkikh, V.: Empirical models of the ocean-sediment and marine sediment-bedrock density contrasts, *Geosciences Journal*, 18, 439–447, <https://doi.org/10.1007/s12303-014-0015-9>, 2014.
- Jungclaus, J. H., Fischer, N., Haak, H., Lohmann, K., Marotzke, J., Matei, D., Mikolajewicz, U., Notz, D., and von Storch, J. S.: Characteristics of the ocean simulations in the Max Planck Institute Ocean Model (MPIOM) the ocean component of the MPI-Earth system model, *Journal of Advances in Modeling Earth Systems*, 5, 422–446, <https://doi.org/https://doi.org/10.1002/jame.20023>, 2013.
- Jungclaus, J. H., Keenlyside, N., Botzet, M., Haak, H., Luo, J. J., Latif, M., Marotzke, J., Mikolajewicz, U., and Roeckner, E.: Ocean circulation and tropical variability in the coupled model ECHAM5/MPI-OM, *JOURNAL OF CLIMATE*, 19, 3952–3972, <https://doi.org/10.1175/JCLI3827.1>, 2006.
- Kleinen, T., Gromov, S., Steil, B., and Brovkin, V.: Atmospheric methane underestimated in future climate projections, *ENVIRONMENTAL RESEARCH LETTERS*, 16, <https://doi.org/10.1088/1748-9326/ac1814>, 2021.
- Mauritsen, T., Bader, J., Becker, T., Behrens, J., Bittner, M., Brokopf, R., Brovkin, V., Claussen, M., Crueger, T., Esch, M., Fast, I., Fiedler, S., Flaeschner, D., Gayler, V., Giorgetta, M., Goll, D. S., Haak, H., Hagemann, S., Hedemann, C., Hohenegger, C., Ilyina, T., Jahns, T., Jimenez-de-la Cuesta, D., Jungclaus, J., Kleinen, T., Kloster, S., Kracher, D., Kinne, S., Kleberg, D., Lasslop, G., Kornblueh, L., Marotzke, J., Matei, D., Meraner, K., Mikolajewicz, U., Modali, K., Moebis, B., Muellner, W. A., Nabel, J. E. M. S., Nam, C. C. W., Notz, D., Nyawira, S.-S., Paulsen, H., Peters, K., Pincus, R., Pohlmann, H., Pongratz, J., Popp, M., Raddatz, T. J., Rast, S., Redler, R., Reick, C. H., Rohrschneider, T., Schemann, V., Schmidt, H., Schnur, R., Schulzweida, U., Six, K. D., Stein, L., Stemmler, I., Stevens, B., von Storch, J.-S., Tian, F., Voigt, A., Vrese, P., Wieners, K.-H., Wilkenskjaeld, S., Winkler, A., and Roeckner, E.: Developments in the MPI-M Earth System Model version 1.2 (MPI-ESM1.2) and Its Response to Increasing CO<sub>2</sub>, *JOURNAL OF ADVANCES IN MODELING EARTH SYSTEMS*, 11, 998–1038, <https://doi.org/10.1029/2018MS001400>, 2019.
